# Supplementary material for: Hydrothermal synthesis of high surface area CuCrO2 for H2 production by methanol steam reforming
Source: Royal Society of Chemistry journal article supplement (doi:10.1039/d1ra01332g), 2021-01-01
Supplement: d1ra01332g1.pdf [file d1ra01332g1.pdf]

## Supplementary information

### Hydrothermal synthesis of high surface area CuCrO<sub>2</sub> for H<sub>2</sub> production by methanol steam reforming

Rong-Jun Huang<sup>a</sup>, Subramanian Sakthinathan<sup>a</sup>, Te-Wei Chiu<sup>a,\*</sup>, Chaofang Dong<sup>b\*</sup>

<sup>a</sup>Department of Materials and Mineral Resources Engineering, National Taipei University of Technology, 1, Section 3, Zhongxiao E. Rd., Taipei 106, Taiwan.

<sup>b</sup>Corrosion and Protection Center, Key Laboratory for Corrosion and Protection (MOE), University of Science and Technology, Beijing, China.

\*Corresponding author: *Email:* [tewei@ntut.edu.tw](mailto:tewei@ntut.edu.tw) (T.-W. Chiu)

*Email:* [cfdong@ustb.edu.cn](mailto:cfdong@ustb.edu.cn) (Chaofang Dong)

#### S. Figure 1

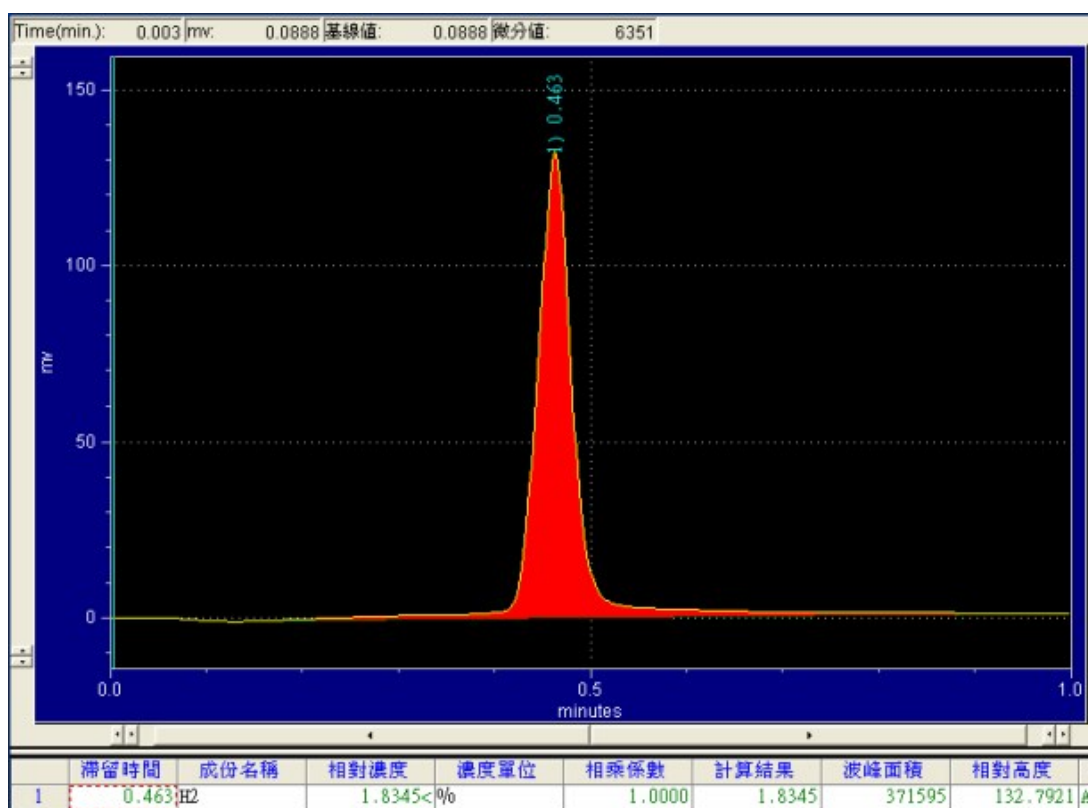

S. Fig. 1. Hydrogen production gas chromatogram at measured at 250 °C

S. Figure 2

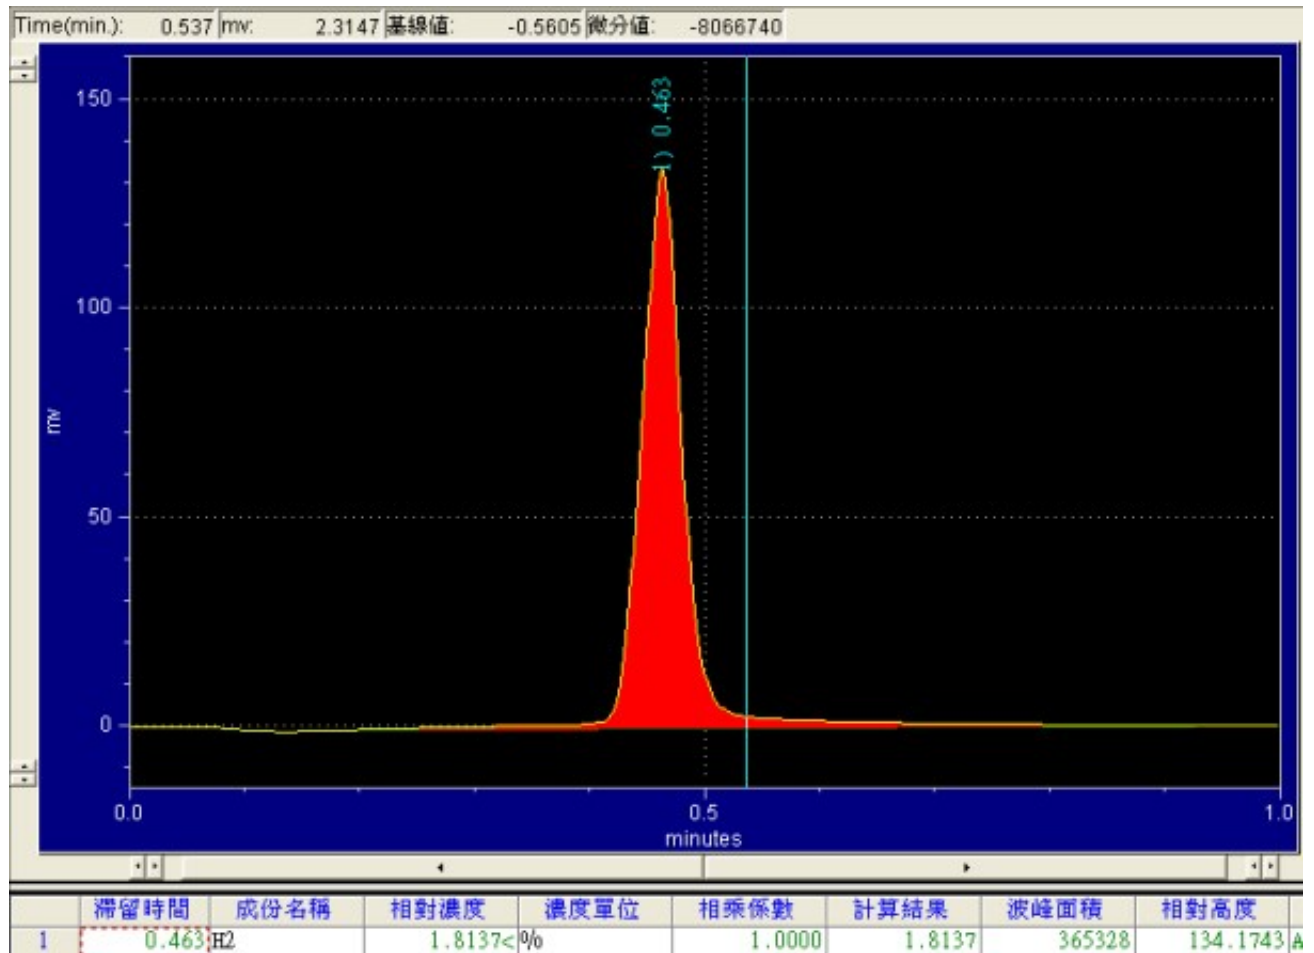

S. Fig. 2. Hydrogen production gas chromatogram at measured at 300°C

S. Figure 3

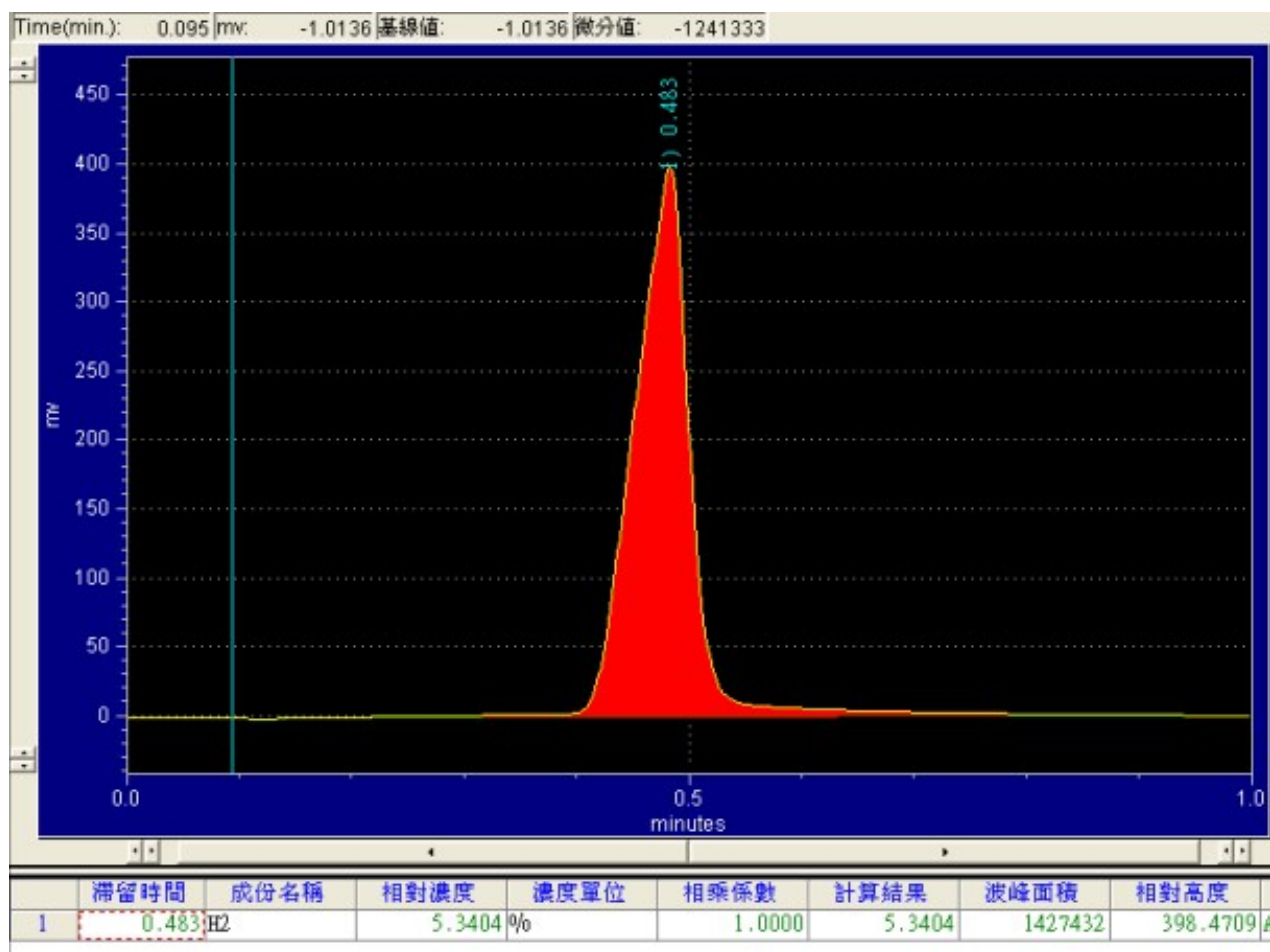

S. Fig. 3. Hydrogen production gas chromatogram at measured at 350°C

S. Figure 4

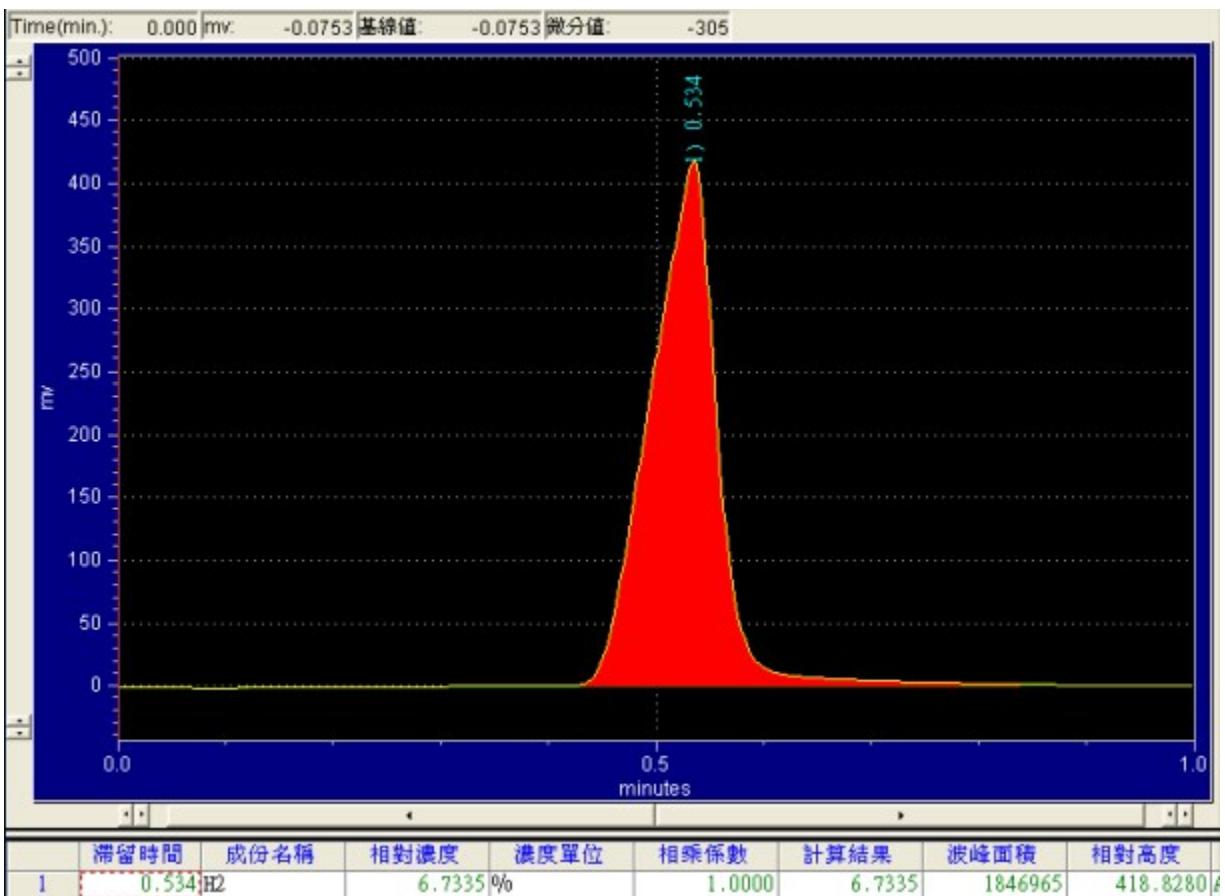

S. Fig. 4. Hydrogen production gas chromatogram at measured at 400°C
